# Supplementary material
Source: PubMed Central journal article supplement (PMC3719389)
Supplement: NIHMS187381-supplement-Supplemental_Tables_I_and_II.pdf [file NIHMS187381-supplement-Supplemental_Tables_I_and_II.pdf]

**Table 1:****Upregulation in HFE null primary RPE**

|                                                                                             | Experiment<br>1 | Fold change<br>Experiment<br>2 | Mean       |
|---------------------------------------------------------------------------------------------|-----------------|--------------------------------|------------|
| <b>Transporters</b>                                                                         |                 |                                |            |
| Slc12a1(sodium potassium chloride cotransporter 2/kidney specific absorptive isoform NKCC2) | 3.2             | 3                              | 3.1        |
| Slc14a1(erythrocyte urea transporter/HUT11/RACH1)                                           | 11.12           | 14.46                          | 12.8       |
| Slc14a2(renal tubular urea transporter/HUT2/UT2)                                            | 2.8             | 2.65                           | 2.7        |
| Slc16a7(monocarboxylic acid transporter/MCT2)                                               | 3.47            | 4.8                            | 4.1        |
| Slc22a20(Organic anion transporter 6/OAT6)                                                  | 3.99            | 2.1                            | 3.1        |
| Slc24a2(Retinal cone Na-Ca+K exchanger/NCKX2)                                               | 3.02            | 4.33                           | 3.7        |
| Slc30a8(zinc transporter/ZnT8)                                                              | 3.1             | 2.44                           | 2.8        |
| Slc47a1(multidrug transporter/MATE1)                                                        | 2.26            | 2.98                           | 2.6        |
| Slc4a4(sodium bicarbonate cotransporter/NBC)                                                | 2.4             | 3.28                           | 2.8        |
| <b>Slc7a11(cystine/glutamate transporter/xCT)</b>                                           | <b>5.72</b>     | <b>3.06</b>                    | <b>4.4</b> |
| Slc8a1(sodium calcium-exchange protein 1/NCX1)                                              | 2.37            | 3.08                           | 2.7        |
| <b>Cell cycle related proteins</b>                                                          |                 |                                |            |
| Alcam(activated leukocyte cell adhesion molecule/CD166)- Cell migration and metastasis)     | 5.8             | 2.94                           | 4.37       |
| Amot(Angiomotin)- embryonic angiogenesis                                                    | 3.54            | 3.96                           | 3.75       |
| Anln(Anillin) - cytokinesis                                                                 | 9.21            | 7.13                           | 8.17       |
| Anxa8(annexin A8)-Mammary gland involution                                                  | 2.36            | 3.32                           | 2.84       |
| Apoa1(apolipoprotein A-I)- colon cancer progression marker                                  | 3.33            | 2.43                           | 2.88       |
| App(amyloid beta (A4) precursor protein)- prostate cancer progression                       | 3.54            | 3.41                           | 3.475      |
| Arhgef6(Rac/Cdc42 guanine exchange factor)-stimulates Rho-dependent signals                 | 2.18            | 2.54                           | 2.36       |
| Bcl11a(B-cell lymphoma 11A/zinc finger transcription factor)- proto-oncogene                | 2.54            | 2.18                           | 2.36       |
| Bcl2a1b(BCL2-related protein A1)- anti-apoptotic protein                                    | 2.95            | 3.21                           | 3.08       |
| Bmp4(bone morphogenetic protein 4)- Regulates expression of proto-oncogenes                 | 2.47            | 5.79                           | 4.13       |
| Cav1(caveolae protein 1)- cell cycle progression                                            | 5.26            | 5.88                           | 5.57       |
| Cav2(caveolin 2)- cell cycle progression                                                    | 2.71            | 3.33                           | 3.02       |
| Ccna2(cyclin A2)- G1/S and G2/M cell cycle progression                                      | 3.96            | 6.32                           | 5.14       |
| Ccnb1(cyclin B1)- G2M cell cycle progression                                                | 6.26            | 4.56                           | 5.41       |
| Ccnb2(cyclin B2)- cell cycle progression                                                    | 4.94            | 2.04                           | 3.49       |
| Cdc25c(cell division cycle 25 homolog C)- G2/M cell cycle progression                       | 2.91            | 4.44                           | 3.675      |
| Cdc2a(cell division cycle 2 homolog A)- G2/M cell cycle progression                         | 4.1             | 2.69                           | 3.395      |
| Cdc2l5(cell division cycle 2-like 5)-cholinesterase-related cell division controller        | 2.18            | 2.48                           | 2.33       |
| Cdc37(cell division cycle 37 homolog)- cell cycle progression                               | 2.01            | 4.33                           | 3.17       |
| Cdc45l(cell division cycle 45 homolog-like)-initiation of DNA replication                   | 4.42            | 5.21                           | 4.815      |
| Cdca2(cell division cycle 2 homolog A)- cell cycle progression                              | 4.88            | 6.75                           | 5.815      |
| Cdca5(cell division cycle associated 5)-Regulator of sister chromatid cohesion in mitosis   | 3.39            | 2.06                           | 2.725      |

|                                                                                               |       |      |        |
|-----------------------------------------------------------------------------------------------|-------|------|--------|
| Cdh2(N-Cadherin)- RPE cell detachment                                                         | 2.49  | 3.9  | 3.195  |
| Cdh3(P-Cadherin)- cell cycle progression                                                      | 2.64  | 3.9  | 3.27   |
| Cdkn2c(Cyclin-dependent kinase inhibitor 2C(p18))-inhibits cell growth depending on pRb       | 2.34  | 3.52 | 2.93   |
| Cenpa(Centromere protein A)-chromosome segregation and spindle assembly during mitosis        | 3.08  | 3.68 | 3.38   |
| Cenpc1(Centromere protein C1)-Kinetochores size and transition to anaphase                    | 2.03  | 2.33 | 2.18   |
| Cenpj(Centromere protein J)- centrosome integrity and normal spindle morphology               | 2.07  | 2.37 | 2.22   |
| Cenpl(Centromere protein L)- kinetochores function and mitotic progression                    | 5.76  | 2.28 | 4.02   |
| Cenpp(Centromere protein P)- kinetochores function and mitotic progression                    | 2.2   | 3.1  | 2.65   |
| Cep110(Centromere protein 110)-centrosome duplication                                         | 2.73  | 2.34 | 2.535  |
| Cep 55(Centromere protein 55)-cytokinesis                                                     | 4.03  | 2.4  | 3.215  |
| Chaf1a(chromatin assembly factor 1, subunit A (p150))-chromatin assembly                      | 2.03  | 2.74 | 2.385  |
| Ckap2l(cytoskeleton associated protein 2 like)                                                | 3.42  | 4.06 | 3.74   |
| Crem(cAMP responsive element modulator)- regulator of cyclin A expression                     | 2.24  | 3.78 | 3.01   |
| Ect2(Epithelial cell transforming sequence 2 oncogene)-DNA synthesis and mitosis              | 10.04 | 7.43 | 8.735  |
| Edn1(endothelin 1)-cell cycle progression                                                     | 4.41  | 3.98 | 4.195  |
| Edn3(endothelin 3)-G1/S cell cycle progression                                                | 5.16  | 3.56 | 4.36   |
| Eln(Elastin)- cell cycle progression                                                          | 4.34  | 4.8  | 4.57   |
| Hdgfl1(hepatoma derived growth factor-like 1)- tumor progression                              | 2.57  | 3    | 2.785  |
| Incenp(Inner centromere protein)- chromosome alignment and segregation                        | 2.38  | 3.28 | 2.83   |
| Kif1b(kinesin family member 1B)-motor protein that transports mitochondria                    | 2.664 | 2.79 | 2.727  |
| Kif22(kinesin family member 22)-chromosome movement during mitosis and meiosis                | 2.72  | 2.2  | 2.46   |
| Kif3a(kinesin family member 3A)-motor protein for organelle transport during mitosis          | 3.7   | 2.35 | 3.025  |
| Mapk4(mitogen-activated protein kinase 4)-promotes entry into cell cycle                      | 3.61  | 2.08 | 2.845  |
| Meis1(myeloid ecotropic viral integration site1)-cofactor for induction of myeloid leukemias  | 2.92  | 3.84 | 3.38   |
| Met(met proto-oncogene)-Receptor for hepatocyte growth factor                                 | 2.54  | 4.12 | 3.33   |
| Muc13(mucin 13, epithelial transmembrane)-tumor progression                                   | 3.06  | 2.3  | 2.68   |
| Mybl1(myeloblastosis oncogene-like 1)-proliferation inducing transcriptional activator        | 3.44  | 4.68 | 4.06   |
| NDC80(NDC80 homolog, kinetochores complex component)-required for chromosome segregation      | 5.86  | 5.12 | 5.49   |
| Nes(nestin)-Trafficking of cellular factors to daughter cells during cell division            | 3.91  | 3.68 | 3.795  |
| Net1(neuroepithelial cell transforming gene 1)-oncogene, a guanine nucleotide exchange factor | 11.32 | 9.15 | 10.235 |
| Nr4a2(Nuclear receptor subfamily 4, group A, member 2)                                        | 4.19  | 7.64 | 5.915  |
| Nrn1(neuritin 1)-Post-mitotic differentiation                                                 | 7.91  | 7.44 | 7.675  |
| Pkn3(protein kinase N3)-contributes to invasiveness in cancer                                 | 3.62  | 3.07 | 3.345  |
| Prkci(protein kinase C, lambda/iota)-involved in cell polarization                            | 4.05  | 5.25 | 4.65   |
| Rabep1(rabaptin)-RAB GTPase binding effector protein 1                                        | 2     | 8.68 | 5.34   |

|                                                                                                              |      |      |       |
|--------------------------------------------------------------------------------------------------------------|------|------|-------|
| RAD18(RAD18 homolog)-post replication repair function                                                        | 4.75 | 4.48 | 4.615 |
| RAN(RAN, member RAS oncogene family)-mitotic spindle regulation during meiosis                               | 2.27 | 2.35 | 2.31  |
| Rfc5(replication factor C (activator 1) 5)-DNA replication along with PCNA                                   | 2.21 | 2.88 | 2.545 |
| Rhou(ras homolog gene family, member U)-stimulates quiescent cells to enter cell cycle                       | 2.73 | 2.69 | 2.71  |
| Sept3(septin 3)-cytokinesis                                                                                  | 3    | 2.6  | 2.8   |
| Sept6(septin 6)-cytokinesis                                                                                  | 3.47 | 3.35 | 3.41  |
| Serinc3(Serine incorporator 3)- cellular transformation                                                      | 2.69 | 3.06 | 2.875 |
| Skp2(S-phase kinase-associated protein 2 (p45))-regulation of G1/S transition                                | 2.22 | 3.71 | 2.965 |
| Tbx20(T-box 20)-transcriptional regulator                                                                    | 3.51 | 5.61 | 4.56  |
| Thada(Thyroid adenoma associated)- gene inducing thyroid adenomas protein                                    | 4.18 | 2.78 | 3.48  |
| Tiam2(T-cell lymphoma invasion and metastasis 2)- guanine nucleotide exchange factor                         | 2.37 | 4.43 | 3.4   |
| Tk1(thymidine kinase 1 (Tk1))- activity high in S-phase of cell cycle in proliferating cells                 | 3.22 | 4.34 | 3.78  |
| Topbp1(topoisomerase (DNA) II beta binding protein)-inhibits E2F1-dependent apoptosis during G1/S transition | 5.05 | 2.17 | 3.61  |
| Vcan(versican)-regulation of cell motility, growth and differentiation                                       | 2.55 | 3.06 | 2.805 |
| Was(Wiskott-Aldrich syndrome homolog)-regulates the structure and dynamics of the actin cytoskeleton         | 6.82 | 27   | 16.91 |

**Table 2:****Downregulation in HFE null primary RPE**

|                                                                                                                     | Experiment<br>1 | Fold change<br>Experiment<br>2 | Mean   |
|---------------------------------------------------------------------------------------------------------------------|-----------------|--------------------------------|--------|
| <b>Transporters</b>                                                                                                 |                 |                                |        |
| Slc10a6(Sodium-dependent organic anion transporter/sodium-bile acid cotransporter family)                           | 2.54            | 3.65                           | 3.095  |
| Slc11a2(Divalent metal transporter (DMT1))                                                                          | 2.56            | 2.52                           | 2.54   |
| Slc12a2(sodium potassium chloride cotransporter 2/secretory isoform NKCC1)                                          | 5.57            | 5.85                           | 5.71   |
| Slc12a4(Erythroid K-Cl cotransporter1/KCC1/single cell volume homeostasis)                                          | 2.23            | 2.38                           | 2.305  |
| Slc16a6(monocarboxylate transporter 7/MCT7)                                                                         | 1.99            | 2.7                            | 2.345  |
| Slc16a9(monocarboxylate transporter 9/MCT9)                                                                         | 5.94            | 3.19                           | 4.565  |
| Slc1a5(Sodium-dependent neutral amino acid transporter type 2/ATB0)                                                 | 2.37            | 2.18                           | 2.275  |
| Slc22a12(Urate anion exchanger 1/URAT1)                                                                             | 2.9             | 2.33                           | 2.615  |
| Slc25a23(Mitochondrial ATP-Mg/Pi carrier protein 2/APC2)                                                            | 3.68            | 3.83                           | 3.755  |
| Slc25a3(mitochondrial phosphate carrier protein/PTP)                                                                | 2.58            | 2.19                           | 2.385  |
| Slc27a1(Fatty acid transport protein 1/FATP1)                                                                       | 2.89            | 2.39                           | 2.64   |
| Slc35c2(Ovarian cancer overexpressed gene 1/OVCOV1)                                                                 | 2.02            | 2.26                           | 2.14   |
| Slc38a7(sodium-dependent amino acid/proton antiporter)                                                              | 2.02            | 3.43                           | 2.725  |
| Slc39a13(zinc transporter member 13/ZIP13)                                                                          | 2.15            | 2.52                           | 2.335  |
| Slc39a14(zinc transporter member 14/ZIP14)                                                                          | 6.12            | 2.62                           | 4.37   |
| Slc43a3(mouse embryonic epithelial gene 1/EEG1)                                                                     | 4.52            | 7.28                           | 5.9    |
| Slc4a2(anion exchanger/AE2)                                                                                         | 2.84            | 3.84                           | 3.34   |
| Slc6a8(Creatine transporter 1/CRT)                                                                                  | 3.23            | 2.74                           | 2.985  |
| Slc6a9(sodium- and chloride-dependent glycine transporter 1/GLYT1)                                                  | 2.01            | 2.2                            | 2.105  |
| Tap1(transporter 1/ATP-binding cassette transporter/ABC transporter, MHC 1)                                         | 2.43            | 2.46                           | 2.445  |
| Fcgrt(Fc fragment of IgG transporter)                                                                               | 6.8             | 8.44                           | 7.62   |
| <b>Cell cycle related proteins</b>                                                                                  |                 |                                |        |
| Alpl(alkaline phosphatase,liver/bone/kidney/tissue non-specific)-growth and development of bones and teeth          | 7.92            | 4.78                           | 6.35   |
| Alx4(aristaless-like homeobox 4)-Transcription factor involved in skull and limb development                        | 4.12            | 3.44                           | 3.78   |
| Angptl4(angiopoietin-related protein)-inhibits proliferation,migration and tubule formation of endothelial cells    | 14.95           | 22.11                          | 18.53  |
| Anp32a(Acidic nuclear phosphoprotein pp32)-tumor suppressor involved in caspase-dependent and independent apoptosis | 4.08            | 2.9                            | 3.49   |
| Apod(Apolipoprotein D)-tumor suppressor                                                                             | 3.32            | 2.82                           | 3.07   |
| Apoe(Apolipoprotein E)-lipoprotein metabolism                                                                       | 5.99            | 3.53                           | 4.76   |
| Aprt(adenine phosphoribosyl transferase)-decreases cell viability                                                   | 3.04            | 2.98                           | 3.01   |
| B2m(beta-2 microglobulin)-major histocompatibility complex class I                                                  | 4.11            | 3.66                           | 3.885  |
| Bcap31(B-cell receptor-associated protein 31)-CASP8-mediated apoptosis                                              | 2.36            | 2.4                            | 2.38   |
| Btg1(B-cell translocation gene 1)-negatively regulates cell proliferation;anti-proliferative                        | 2.7             | 3.4                            | 3.05   |
| C1qtnf5(C1q and tumor necrosis factor related protein 5 )-role in late-onset retinal degeneration                   | 10.4            | 9.65                           | 10.025 |

|                                                                                                                   |       |       |        |
|-------------------------------------------------------------------------------------------------------------------|-------|-------|--------|
| C2(complement 2)-inhibits cancer progression by suppressing protein translation initiation                        | 8.76  | 8.16  | 8.46   |
| C3(complement 3)-tumor suppressor                                                                                 | 4.22  | 4.56  | 4.39   |
| Cadm3(cell adhesion molecule 3)-cell to cell adhesion                                                             | 6.88  | 3.05  | 4.965  |
| Ccndbp1(cyclin D-type binding-protein 1)-negative regulator of gene expression                                    | 2.76  | 3.3   | 3.03   |
| Ccng1(Cyclin G1)- inhibitor of cell proliferation by p53 mediated G2/M phase arrest                               | 2.17  | 2.43  | 2.3    |
| Cdh11(cadherin 11)- cell to cell adhesion                                                                         | 2.84  | 2.88  | 2.86   |
| Cdkn1a(cyclin-dependent kinase inhibitor 1A (p21/WAF1))- DNA synthesis inhibitor                                  | 4.83  | 2.6   | 3.715  |
| Cdkn2b(cyclin-dependent kinase inhibitor 2B (p15)- induces cell cycle arrest                                      | 5.83  | 5.83  | 5.83   |
| Cebpb(CCAAT/enhancer binding protein (C/EBP), beta)-inhibits cell proliferation                                   | 3.28  | 2.93  | 3.105  |
| Cfb(complement factor B)- regulates immune response                                                               | 19.14 | 19.18 | 19.16  |
| Cfh(complement factor H)- downregulation increases susceptibility to AMD                                          | 6.75  | 2.51  | 4.63   |
| Ch25h(Cholesterol 25-hydroxylase)-involved in lipid metabolism and to repress cholesterol biosynthesis            | 7.44  | 10.77 | 9.105  |
| Chl1(cell adhesion molecule with homology to L1CAM)-cell to cell adhesion                                         | 3.13  | 5.76  | 4.445  |
| Clec11a(C-type lectin domain family 11, member a)-Suppresses SCF-stimulated erythrocyte proliferation             | 6.89  | 8.94  | 7.915  |
| Cpxm1(carboxypeptidase X 1 (M14 family))-cell to cell interaction                                                 | 6.86  | 9.26  | 8.06   |
| Cst3(cystatin C)-mutation results in amyloid angiopathy                                                           | 9.05  | 8.9   | 8.975  |
| Cstb(cystatin B)-intracellular thiol protease inhibitor                                                           | 3.62  | 3.94  | 3.78   |
| Dbc1(deleted in bladder cancer 1)-Inhibits cell proliferation by negative regulation of the G1/S transition       | 4.41  | 3.99  | 4.2    |
| Egfr(Epidermal growth factor receptor)-mutation results in many forms of cancer                                   | 4.1   | 7.66  | 5.88   |
| Fastk(Fas-activated serine/threonine kinase)-important role in apoptosis                                          | 2.78  | 3.2   | 2.99   |
| Fn1(Fibronectin 1)- maintenance of cell shape                                                                     | 3.06  | 2.51  | 2.785  |
| Gadd45g(growth arrest and DNA-damage-inducible 45 gamma)-cell cycle arrest                                        | 8.09  | 5.79  | 6.94   |
| Gpc1(glypican proteoglycan 1)- controls cell cycle                                                                | 7.33  | 7.42  | 7.375  |
| HBP1(HMG-box transcription factor 1)-regulation of the cell cycle and of the Wnt pathway                          | 3.007 | 3.91  | 3.4585 |
| Hic1(hypermethylated in cancer 1)-tumor suppressor                                                                | 3.1   | 4.94  | 4.02   |
| Lox(lysyl oxidase)-tumor suppressor                                                                               | 3.37  | 2.52  | 2.945  |
| Mtap(methylthioadenosine phosphorylase )-downregulated in many forms of cancer                                    | 2.3   | 3.68  | 2.99   |
| Mtch1(mitochondrial carrier homolog 1)-plays a role in apoptosis                                                  | 4.34  | 3.86  | 4.1    |
| Nedd8(Neural precursor cell expressed developmentally down-regulated)-promotes proteasomal degradation of cyclins | 2.78  | 4.27  | 3.525  |
| Ogn(osteo glycin (osteoinductive factor))-induces bone formation                                                  | 25.6  | 22.3  | 23.95  |
| Parp3(poly (ADP-ribose) polymerase family, member 3)-negatively regulates G1/S cell cycle progression             | 3.59  | 4.51  | 4.05   |
| Pfdn5(prefoldin 5)-repress the transcriptional activity of the proto-oncogene c-Myc                               | 4.54  | 3.4   | 3.97   |
| Pik3r1(phosphatidylinositol 3-kinase regulatory subunit1 (p85 alpha)- mutation enhances insulin resistance        | 5.65  | 7.4   | 6.525  |
| Pink1(PTEN-induced putative kinase protein 1)-protects cells from                                                 | 6.44  | 5.4   | 5.92   |

|                                                                                                                            |       |       |        |
|----------------------------------------------------------------------------------------------------------------------------|-------|-------|--------|
| stress induced mitochondrial dysfunction                                                                                   |       |       |        |
| Ppap2b(Phosphatidate phosphohydrolase type 2b)-involved in cell adhesion                                                   | 2.94  | 3.17  | 3.055  |
| Prelp(Proline-arginine-rich end leucine-rich repeat protein)-anchor basement membranes to the underlying connective tissue | 23.95 | 25.35 | 24.65  |
| Rarres1(RAR-responsive protein TIG1)- downregulated in cancer                                                              | 4.77  | 4.39  | 4.58   |
| Rarres2(RAR-responsive protein TIG2)- potent growth inhibitor                                                              | 86.13 | 73    | 79.565 |
| St5(suppression of tumorigenicity 5)-tumor suppressor                                                                      | 2.81  | 3.24  | 3.025  |
| Tnmd(tenomodulin)- acts as an angiogenesis inhibitor                                                                       | 6.21  | 5.33  | 5.77   |
| Wasf2(WAS protein family, member 2)-regulates cell shape and motility                                                      | 2.5   | 2.19  | 2.345  |
| Wisp2(WNT1 inducible signaling pathway protein 2)-modulates bone turnover and is downregulated in tumors                   | 4.9   | 5.25  | 5.075  |
